# Supplementary material for: Single-Oocyte Gene Expression Suggests That Curcumin Can Protect the Ovarian Reserve by Regulating the PTEN-AKT-FOXO3a Pathway
Source: MDPI journal article supplement (doi:10.3390/ijms22126570), 2021-06-18
Supplement: s1 [file s1]

**Supplementary Figure S1.** Single oocyte isolation and candidate gene expression profiling. **(A)** Isolated single oocytes. The diameter of the glass mi-cropipette in the left figure is 30  $\mu\text{m}$ , and the diameter of the glass micropipette in the right figure is 50  $\mu\text{m}$ . **(B)** The mean M-value of the 5 reference genes using the geNorm algorithm. **(C)** PCA of 80 single oocytes. **(D)** Heatmap and hierarchical clustering analysis of 80 oocytes. PD: Primordial follicle oocytes, PY: Primary follicle oocytes.

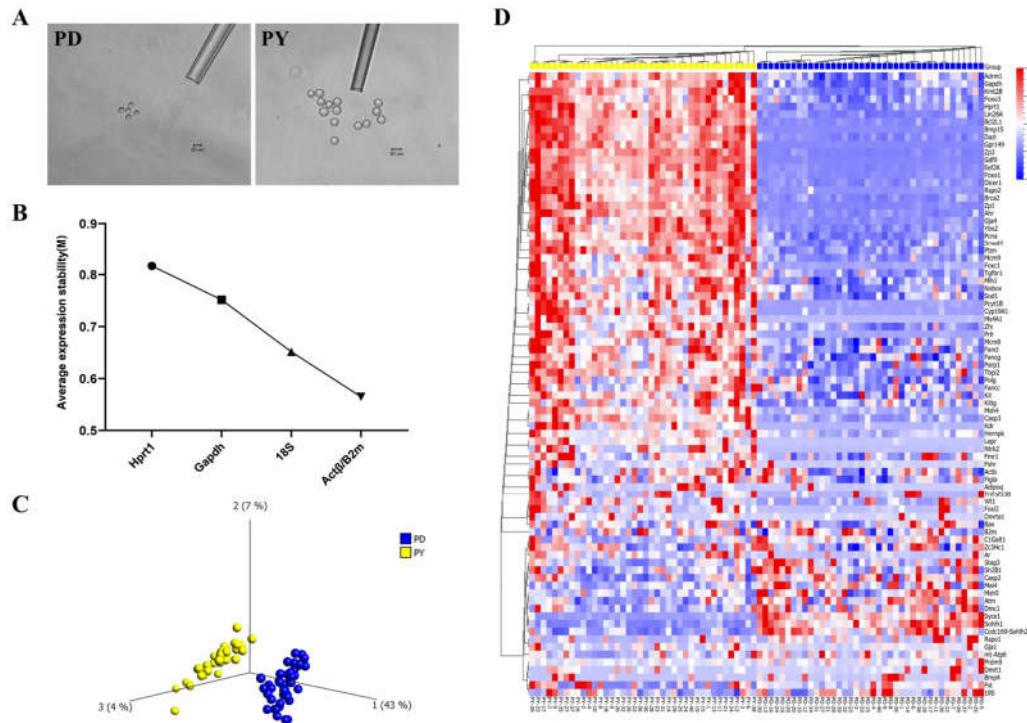

**Supplementary Table S1. Gene information of custom TaqMan array cards**

| <b>Genes</b>          | <b>Assay IDs</b> | <b>Genes</b>   | <b>Assay IDs</b> |
|-----------------------|------------------|----------------|------------------|
| <i>Ahr</i>            | Mm00478932_m1    | <i>Dazl</i>    | Mm01273546_m1    |
| <i>Bax</i>            | Mm00432051_m1    | <i>Adipoq</i>  | Mm00456425_m1    |
| <i>Casp2</i>          | Mm01160323_m1    | <i>Zp3</i>     | Mm00442176_m1    |
| <i>Eef2K</i>          | Mm00432996_m1    | <i>Zfx</i>     | Mm03053842_s1    |
| <i>Figla</i>          | Mm00488823_m1    | <i>Ybx2</i>    | Mm00497476_m1    |
| <i>Foxo3</i>          | Mm01185722_m1    | <i>Stra8</i>   | Mm00486473_m1    |
| <i>Fshr</i>           | Mm00442819_m1    | <i>Dmrt1</i>   | Mm00443809_m1    |
| <i>Gdf9</i>           | Mm00433565_m1    | <i>Atm</i>     | Mm01177457_m1    |
| <i>Kit</i>            | Mm00445212_m1    | <i>Adrm1</i>   | Mm00727402_s1    |
| <i>Kitlg</i>          | Mm00442972_m1    | <i>Vgf</i>     | Mm01204485_s1    |
| <i>Lep</i>            | Mm00434759_m1    | <i>PcytlB</i>  | Mm00616920_m1    |
| <i>Lin28A</i>         | Mm00524077_m1    | <i>Fancc</i>   | Mm00514846_m1    |
| <i>Mei4</i>           | Mm00613706_m1    | <i>Tgfbr1</i>  | Mm00436964_m1    |
| <i>Parp1</i>          | Mm01321084_m1    | <i>Sh2B1</i>   | Mm01137783_m1    |
| <i>Pcna</i>           | Mm00448100_g1    | <i>Ptger2</i>  | Mm00436051_m1    |
| <i>Smad4</i>          | Mm03023996_m1    | <i>Ntrk2</i>   | Mm00435422_m1    |
| <i>Spo11</i>          | Mm00488876_m1    | <i>Gpr149</i>  | Mm00805216_m1    |
| <i>Tbpl2</i>          | Mm01337558_m1    | <i>C1Galt1</i> | Mm01167001_m1    |
| <i>Vip</i>            | Mm00660234_m1    | <i>Robo2</i>   | Mm00620713_m1    |
| <i>Zc3Hc1</i>         | Mm01168068_m1    | <i>Sod1</i>    | Mm01344233_g1    |
| <i>Casp3</i>          | Mm01195085_m1    | <i>Prdm9</i>   | Mm01279317_m1    |
| <i>Ccdc169-Sohlh2</i> | Mm00512314_m1    | <i>Msh4</i>    | Mm01320240_m1    |
| <i>Cxcr5</i>          | Mm00432086_m1    | <i>Gja4</i>    | Mm00433610_s1    |
| <i>Cyp19A1</i>        | Mm00484049_m1    | <i>Fst</i>     | Mm00514982_m1    |
| <i>Gjal</i>           | Mm01179639_s1    | <i>Fancl</i>   | Mm00840321_m1    |
| <i>Ms4A1</i>          | Mm00545909_m1    | <i>Fancg</i>   | Mm00474063_m1    |
| <i>Ngf</i>            | Mm00443039_m1    | <i>Bmp4</i>    | Mm00432087_m1    |
| <i>Nkx2-3</i>         | Mm01199403_m1    | <i>Bcl2L1</i>  | Mm00437783_m1    |
| <i>Prlr</i>           | Mm04336676_m1    | <i>Dicer1</i>  | Mm00521722_m1    |
| <i>Rspo1</i>          | Mm00507077_m1    | <i>Dmrt1</i>   | Mm00558696_m1    |
| <i>Rspo2</i>          | Mm00555790_m1    | <i>Foxc1</i>   | Mm01962704_s1    |

---

|                  |               |                |               |
|------------------|---------------|----------------|---------------|
| <i>Rxrg</i>      | Mm00436411_m1 | <i>Hnrnpk</i>  | Mm04409831_s1 |
| <i>Tnf</i>       | Mm00443258_m1 | <i>Kdr</i>     | Mm01222421_m1 |
| <i>Tnfrsf13B</i> | Mm00840182_m1 | <i>Kmt2B</i>   | Mm01175393_g1 |
| <i>I8S</i>       | Hs99999901_s1 | <i>Lepr</i>    | Mm00440181_m1 |
| <i>Gapdh</i>     | Mm99999915_g1 | <i>Zpl</i>     | Mm00494367_m1 |
| <i>Hprt1</i>     | Mm00446968_m1 | <i>Brca2</i>   | Mm01218747_m1 |
| <i>Actb</i>      | Mm00607939_s1 | <i>Foxo1</i>   | Mm00490671_m1 |
| <i>B2m</i>       | Mm00437762_m1 | <i>Mcm8</i>    | Mm00508536_m1 |
| <i>Ar</i>        | Mm00442688_m1 | <i>Mcm9</i>    | Mm01179858_m1 |
| <i>Bmp15</i>     | Mm00437797_m1 | <i>Msh5</i>    | Mm00488974_m1 |
| <i>Dmcl</i>      | Mm00494490_m1 | <i>mt-Atp6</i> | Mm03649417_g1 |
| <i>Fmr1</i>      | Mm01339582_m1 | <i>Nog</i>     | Mm01297833_s1 |
| <i>Foxl2</i>     | Mm00843544_s1 | <i>Polg</i>    | Mm00450527_m1 |
| <i>Lhcgr</i>     | Mm00442931_m1 | <i>Pten</i>    | Mm00477208_m1 |
| <i>Nobox</i>     | Mm00453743_m1 | <i>Stag3</i>   | Mm00450460_m1 |
| <i>Sohlh1</i>    | Mm01338424_g1 | <i>Wtl</i>     | Mm01337048_m1 |
| <i>Mlh1</i>      | Mm00503449_m1 | <i>Syce1</i>   | Mm01279053_m1 |

---

**Supplementary Table S2 primer sequences**

| Name         | Accession number | Forward primer (5'→3')                             |
|--------------|------------------|----------------------------------------------------|
|              |                  | Reverse primer (5'→3')                             |
| <i>Actb</i>  | NM_007393.5      | GGCTGTATTCCCCTCCATCG<br>CCAGTTGGTAACAATGCCATGT     |
| <i>Pten</i>  | NM_008960.2      | TGGATTGCGACTTAGACTTGACCT<br>GCGGTGTCATAATGTCTCTCAG |
| <i>Foxo3</i> | NM_001376967.1   | CTGGGGGAACCTGTCCTATG<br>TCATTCTGAACGCGCATGAAG      |
| <i>Nobox</i> | NM_130869.3      | ATGGAACCTACGGAGAAGCTC<br>CTCAGAGGTCTTCGACAGTGG     |
| <i>Amh</i>   | NM_007445.3      | CCACACCTCTCTCCACTGGTA<br>GGCACAAAGGTTTCAGGGGG      |
| <i>Gdf9</i>  | NM_008110.2      | TCTTAGTAGCCTTAGCTCTCAGG<br>TGTCAGTCCCATCTACAGGCA   |
| <i>Casp3</i> | NM_001284409.1   | GAGCTTGGAACGGTACGCTA<br>CCGTACCAGAGCGAGATGAC       |
| <i>Bcl2</i>  | NM_009741.5      | GAACTGGGGGAGGATTGTGG<br>GCATGCTGGGGCCATATAGT       |
| <i>Il-6</i>  | NM_001314054.1   | CCAAGAGGTGAGTGCTTCCC<br>CTGTTGTTTCAGACTCTCTCCCT    |
| <i>Ikbkb</i> | NM_001159774.1   | GTAGCAAAGTCCGAGGTCCC<br>GTCTAGAGTCGTGAAGCTTCTGT    |
